# Supplementary material
Source: publisher figshare collection journal article supplement (https://sage.figshare.com/ndownloader/files/21208134)
Supplement: Supplementary file 1 [file 21208134]

**Supplementary Table 1. Norms for the Multidimensional Schizotypy Subscales**

|                             | <u>Mean</u> | <u>SD</u> |
|-----------------------------|-------------|-----------|
| MSS Positive Schizotypy     | 3.587       | 4.384     |
| MSS Negative Schizotypy     | 3.604       | 4.436     |
| MSS Disorganized Schizotypy | 4.008       | 5.751     |

Norms based upon 9,366 adults assessed at four universities and on Amazon Mechanical Turk

**Supplementary Table 2. Linear Regressions Examining Prediction by the Multidimensional Schizotypy Scale Subscales ( $n = 177$ )**

| Criteria:                  | MSS Positive Schizotypy |      |       |       | MSS Negative Schizotypy |      |        |       | MSS Disorganized Schizotypy |      |       |       |
|----------------------------|-------------------------|------|-------|-------|-------------------------|------|--------|-------|-----------------------------|------|-------|-------|
|                            | B                       | SE   | 95%CI |       | B                       | SE   | 95%CI  |       | B                           | SE   | 95%CI |       |
|                            |                         |      | Lower | Upper |                         |      | Lower  | Upper |                             |      | Lower | Upper |
| Global Functioning         | -.332**                 | .127 | -.585 | -.085 | -1.055***               | .130 | -1.290 | -.772 | -.665***                    | .097 | -.863 | -.478 |
| SIPS-Positive Symptoms     | .416***                 | .044 | .325  | .501  | .141***                 | .047 | .055   | .238  | .039                        | .034 | -.028 | .105  |
| SIPS-Disorganized Symptoms | .092**                  | .031 | .032  | .153  | .067*                   | .032 | .005   | .133  | .229***                     | .026 | .178  | .278  |
| NSM Negative Symptoms      | -.078                   | .042 | -.162 | .007  | .481***                 | .058 | .356   | .587  | .150**                      | .043 | .071  | .238  |
| NSM Attentional Deficits   | .019                    | .014 | -.010 | .047  | .004                    | .013 | -.020  | .030  | .088***                     | .011 | .065  | .109  |
| Schizotypal Symptoms       | .211***                 | .029 | .153  | .268  | .172***                 | .040 | .094   | .255  | .027                        | .025 | -.024 | .075  |
| Schizoid Symptoms          | -.061*                  | .029 | -.116 | -.004 | .272***                 | .048 | .165   | .354  | -.009                       | .021 | -.049 | .032  |
| Paranoid Symptoms          | .075**                  | .026 | .029  | .128  | .077**                  | .025 | .029   | .126  | .005                        | .015 | -.025 | .036  |
| Alcohol Use                | .123                    | .101 | -.068 | .334  | -.338***                | .096 | -.531  | -.152 | .057                        | .077 | -.092 | .207  |
| Alcohol Impairment         | .018                    | .011 | -.003 | .041  | -.025**                 | .009 | -.044  | -.009 | .010                        | .008 | -.006 | .025  |
| Drug Use                   | .035                    | .072 | -.088 | .197  | -.026                   | .050 | -.125  | .076  | .058                        | .051 | -.044 | .161  |
| Drug Impairment            | .002                    | .015 | -.027 | .034  | -.033**                 | .010 | -.053  | -.013 | .030**                      | .011 | .008  | .050  |

\* $p < .05$ \*\* $p < .01$ \*\*\* $p < .001$ 

Note: bootstrapped raw regression (B) coefficients with 1000 samples with 95% Confidence Intervals

Each row represents a separate regression analysis in which the three MSS subscales were entered simultaneously as predictors to examine their unique prediction of each of the interview measures.

**Supplementary Table 3. Linear Regressions Examining Prediction of Paranoid Personality Disorder Traits by the Multidimensional Schizotypy Scale Subscales ( $n = 177$ )**

| MSS Positive Schizotypy        |          |               |              |              | MSS Negative Schizotypy |               |              |              | MSS Disorganized Schizotypy |               |              |              |                            |
|--------------------------------|----------|---------------|--------------|--------------|-------------------------|---------------|--------------|--------------|-----------------------------|---------------|--------------|--------------|----------------------------|
| <u>Paranoid PD Criteria:</u>   | <u>β</u> | <u>B (SE)</u> | <u>95%CI</u> |              | <u>β</u>                | <u>B (SE)</u> | <u>95%CI</u> |              | <u>β</u>                    | <u>B (SE)</u> | <u>95%CI</u> |              | <u>Total R<sup>2</sup></u> |
|                                |          |               | <u>Lower</u> | <u>Upper</u> |                         |               | <u>Lower</u> | <u>Upper</u> |                             |               | <u>Lower</u> | <u>Upper</u> |                            |
| Reluctance to confide          | .204**   | .018 (.008)   | .004         | .035         | .242**                  | .018 (.009)   | .002         | .035         | -.062                       | -.004 (.004)  | -.012        | .004         | .099***                    |
| Doubts loyalty/trustworthiness | .165*    | .019 (.010)   | .001         | .037         | .237**                  | .023 (.010)   | .003         | .044         | .012                        | .001 (.006)   | -.011        | .014         | .088**                     |
| Bears grudges                  | .009     | .001 (.007)   | -.012        | .014         | .139                    | .011 (.008)   | -.003        | .029         | .096                        | .006 (.005)   | -.003        | .017         | .032                       |
| Perceives attacks and reacts   | .068     | .004 (.005)   | -.004        | .014         | .050                    | .003 (.005)   | -.006        | .007         | -.001                       | .000 (.003)   | -.006        | .007         | .007                       |
| Reads hidden meanings          | .148     | .009 (.007)   | -.002        | .024         | .029                    | .001 (.003)   | -.004        | .008         | .056                        | .002 (.003)   | -.003        | .010         | .030                       |
| Expects exploitation           | .168*    | .013 (.007)   | .000         | .026         | .233**                  | .015 (.008)   | .000         | .031         | .005                        | .000 (.004)   | -.008        | .010         | .086                       |
| Suspects infidelity            | .192*    | .012 (.006)   | .002         | .024         | .120                    | .006 (.005)   | -.002        | .016         | -.021                       | -.001 (.003)  | -.006        | .005         | .051*                      |

\* $p < .05$     \*\* $p < .01$     \*\*\* $p < .001$

Note: bootstrapped raw regression (B) coefficients with 1000 samples with 95% Confidence Intervals

Each row represents a separate regression analysis in which the three MSS subscales were entered simultaneously as predictors of paranoid personality disorder traits.

**Supplementary Table 4. Linear Regressions Examining Prediction of Schizotypal Personality Disorder Traits by the Multidimensional Schizotypy Scale Subscales (n = 177)**

| MSS Positive Schizotypy   |         |              |       |       | MSS Negative Schizotypy |             |       |       | MSS Disorganized Schizotypy |              |       |       |             |
|---------------------------|---------|--------------|-------|-------|-------------------------|-------------|-------|-------|-----------------------------|--------------|-------|-------|-------------|
| Schizotypal PD Criteria:  | $\beta$ | B (SE)       | 95%CI |       | $\beta$                 | B (SE)      | 95%CI |       | $\beta$                     | B (SE)       | 95%CI |       | Total $R^2$ |
|                           |         |              | Lower | Upper |                         |             | Lower | Upper |                             |              | Lower | Upper |             |
| Lack of close friends     | .012    | .001 (.005)  | -.010 | .011  | .561***                 | .038 (.008) | .021  | .054  | -.187**                     | -.011 (.004) | -.018 | -.004 | .324***     |
| Excessive social anxiety  | .058    | .003 (.003)  | -.002 | .009  | .314***                 | .013 (.008) | -.002 | .009  | -.078                       | -.003 (.003) | -.008 | .002  | .102***     |
| Ideas of reference        | .311*** | .036 (.010)  | .019  | .056  | .040                    | .004 (.008) | -.008 | .018  | .105                        | .009 (.007)  | -.005 | .024  | .123***     |
| Odd beliefs               | .573*** | .073 (.010)  | .053  | .092  | .065                    | .007 (.008) | -.009 | .024  | .027                        | .003 (.007)  | -.010 | .015  | .342***     |
| Unusual perceptual exp.   | .323*** | .033 (.009)  | .013  | .050  | .119                    | .010 (.007) | -.002 | .027  | .067                        | .005 (.006)  | -.007 | .018  | .136***     |
| Odd thought and speech    | .215**  | .026 (.009)  | .008  | .043  | .322***                 | .033 (.009) | .014  | .052  | .206**                      | .018 (.009)  | .000  | .035  | .230***     |
| Odd behavior              | .003    | .000 (.005)  | -.008 | .010  | .371***                 | .020 (.007) | .006  | .035  | .068                        | .003 (.004)  | -.005 | .011  | .149***     |
| Inapp./constricted affect | -.015   | -.001 (.004) | -.008 | .007  | .312***                 | .019 (.008) | .005  | .034  | -.007                       | .000 (.004)  | -.009 | .009  | .097***     |
| Suspiciousness            | .360*** | .040 (.007)  | .027  | .050  | .287***                 | .028 (.009) | .010  | .046  | .039                        | .003 (.006)  | -.008 | .015  | .229***     |

\* $p < .05$     \*\* $p < .01$     \*\*\* $p < .001$

Note: bootstrapped raw regression (B) coefficients with 1000 samples with 95% Confidence Intervals

Each row represents a separate regression analysis in which the three MSS subscales were entered simultaneously as predictors of paranoid personality disorder traits.

**Supplementary Table 5. Variance Accounted for by MSS Subscales and MSS Total Score (*n*=177)**

| <u>Criteria</u>            | <u>Variance accounted<br/>by MSS Total Score</u> | <u>Variance accounted<br/>for by MSS Subscales</u> | <u>% of Subscale variance<br/>accounted by MSS Total</u> |
|----------------------------|--------------------------------------------------|----------------------------------------------------|----------------------------------------------------------|
| Global Functioning         | 0.402                                            | 0.449                                              | 89.5%                                                    |
| SIPS-Positive Symptoms     | 0.255                                            | 0.398                                              | 64.1%                                                    |
| SIPS-Disorganized Symptoms | 0.388                                            | 0.459                                              | 84.6%                                                    |
| NSM Negative Symptoms      | 0.264                                            | 0.510                                              | 51.8%                                                    |
| NSM Attentional Deficits   | 0.211                                            | 0.314                                              | 67.1%                                                    |
| Schizotypal Symptoms       | 0.314                                            | 0.413                                              | 75.9%                                                    |
| Schizoid Symptoms          | 0.091                                            | 0.436                                              | 20.9%                                                    |
| Paranoid Symptoms          | 0.109                                            | 0.155                                              | 70.3%                                                    |
| Alcohol Use                | 0.005                                            | 0.080                                              | 6.8%                                                     |
| Alcohol Impairment         | 0.000                                            | 0.052                                              | 0.7%                                                     |
| Drug Use                   | 0.004                                            | 0.010                                              | 43.6%                                                    |
| Drug Impairment            | 0.002                                            | 0.078                                              | 2.8%                                                     |
